# Supplementary material for: Single crystalline magnetite, maghemite, and hematite nanoparticles with rich coercivity
Source: Royal Society of Chemistry journal article supplement (doi:10.1039/c3ra45457f), 2013-11-14
Supplement: c3ra45457f.pdf [file c3ra45457f.pdf]

## Electronic Supplementary Information

# Single crystalline magnetite, maghemite, and hematite nanoparticles with rich coercivity

M. Ibrahim Dar<sup>a,b</sup> and S. A. Shivashankar\*<sup>a,b</sup>

<sup>a</sup> Centre for Nano Science and Engineering, Indian Institute of Science, Bangalore 560012, India.

<sup>b</sup> Materials Research Centre, Indian Institute of Science, Bangalore 560012, India.

E-mail: shivu@cense.iisc.ernet.in

Fax: +91 80 2360 4656; Tel: +91 80 2293 3323

**Table S1.** Table showing comparison of *d*-spacing values of Fe<sub>3</sub>O<sub>4</sub> and γ-Fe<sub>2</sub>O<sub>3</sub> nanoparticles

| γ-Fe <sub>2</sub> O <sub>3</sub> (JCPDS<br>no = 39-1346) | Magnetite- (JCPDS<br>no=19-0629) | γ-Fe <sub>2</sub> O <sub>3</sub> | Magnetite |
|----------------------------------------------------------|----------------------------------|----------------------------------|-----------|
| 30.241                                                   | 30.095                           | 30.299                           | 30.077    |
| 35.631                                                   | 35.423                           | 35.657                           | 35.401    |
| 43.285                                                   | 43.053                           | 43.368                           | 43.009    |
| 62.927                                                   | 62.516                           | 62.974                           | 62.522    |

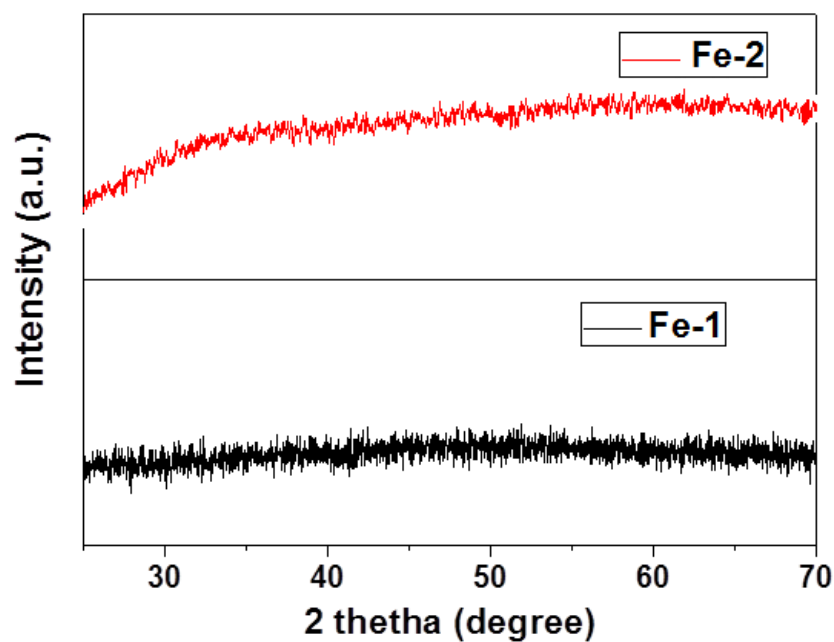

Fig. S1 X-ray powder diffraction patterns for Fe-1 and Fe-2 nanoparticles

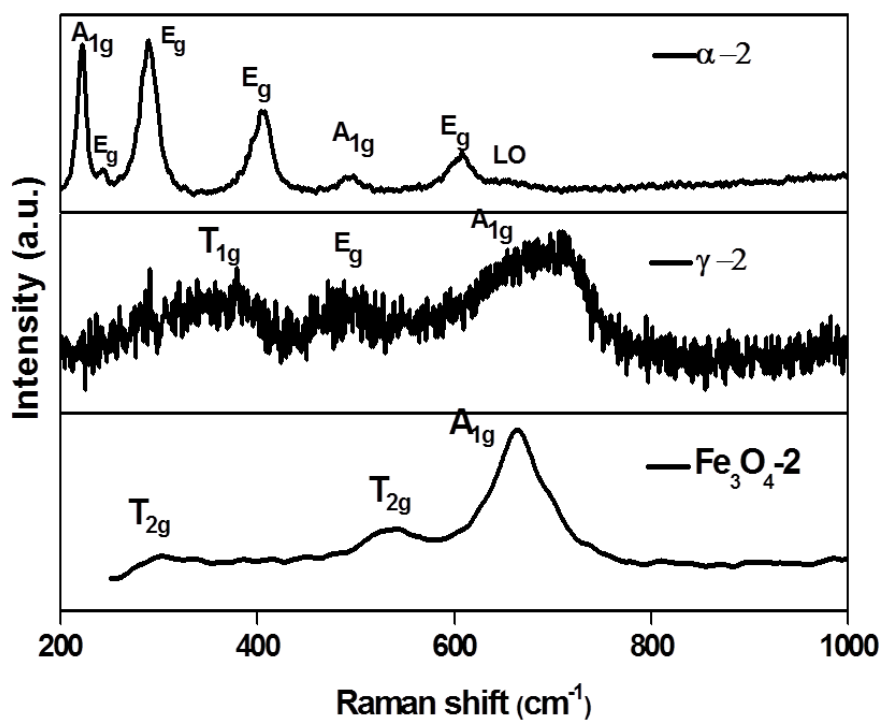

Fig. S2 Raman spectra of Fe<sub>3</sub>O<sub>4</sub>-2, γ-2 and α-2 nanoparticles.

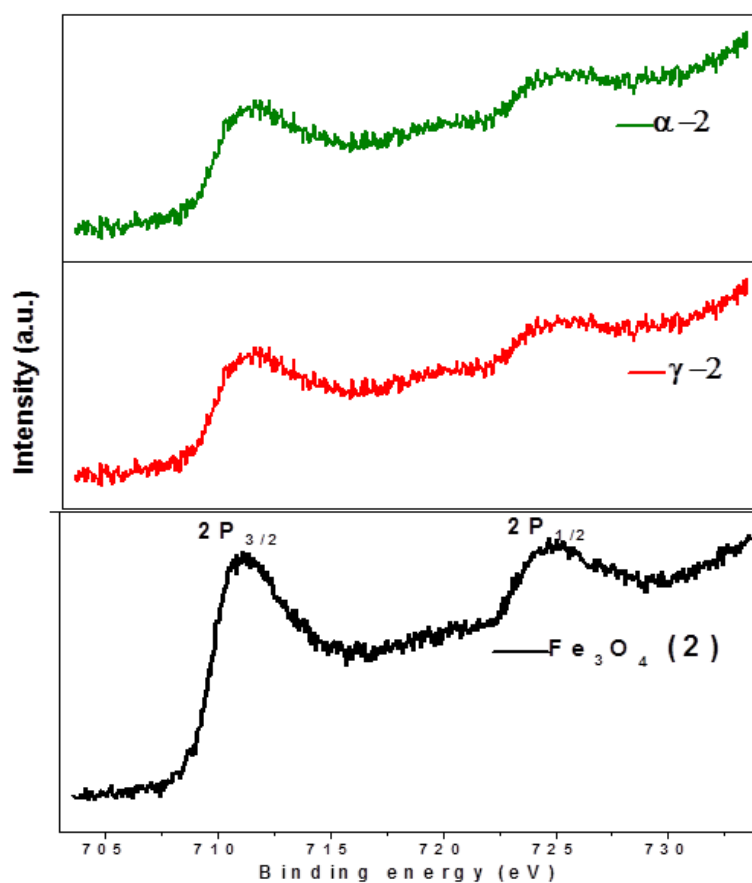

**Fig. S3** Core shell Fe2p XPS data for Fe<sub>3</sub>O<sub>4</sub>-2, γ-2 and α-2 nanoparticles.

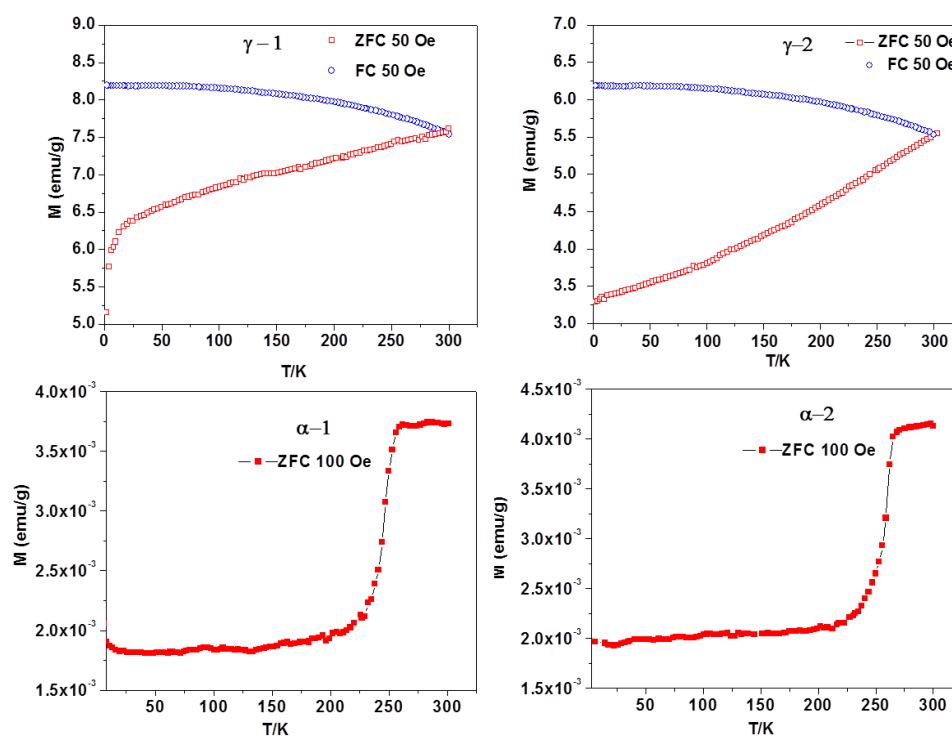

**Fig. S4** Temperature-dependent magnetization in γ-Fe<sub>2</sub>O<sub>3</sub> and α-Fe<sub>2</sub>O<sub>3</sub> nanoparticles.

***Stoner-Wohlfarth equation:***

The Coercivity ( $H_C$ ) is given by

$$H_C = \frac{2K}{M_S} \left[ 1 - \left( \frac{25kT}{KV} \right)^{1/2} \right]$$

where  $H_C$  is the coercivity,  $K$  is the anisotropic constant,  $M_S$  is the saturation magnetization,  $k$  is the Boltzmann constant,  $V$  is the volume of the particle and  $T$  is the absolute temperature.

**Table S2:** Summary of magnetic data for different samples derived from hysteresis loops obtained at 300 K and the corresponding calculated  $H_C$  values at 300 K.

| Sample code   | Nanocrystal size (TEM) | $M_S$ (emu/g) | $H_C$ (Oe) | $H_C$ (Oe) (calculated) |
|---------------|------------------------|---------------|------------|-------------------------|
| $Fe_3O_4$ - 1 | 30                     | 72            | 818        | 1530                    |
| $Fe_3O_4$ - 2 | 37                     | 71            | 927        | 1770                    |
| $\gamma$ -1   | 35                     | 70            | 813        | 1492                    |
| $\gamma$ -2   | 39                     | 69            | 910        | 1687                    |
| $\alpha$ -1   | 60                     | 0.9           | 3531       | 5771                    |
| $\alpha$ -2   | 65                     | 0.5           | 3590       | 5942                    |
